# Supplementary material for: Application of the CANARY event detection software for real-time performance monitoring of decentralized water reuse systems
Source: Royal Society of Chemistry journal article supplement (doi:10.1039/c6ew00226a), 2016-12-01
Supplement: c6ew00226a1.pdf [file c6ew00226a1.pdf]

## **Supporting Information**

### **Application of the CANARY Event Detection Software for Real-Time Performance**

#### **Monitoring of Decentralized Water Reuse Systems**

Aaron Leow, Jonathan Burkhardt, William E. Platten III, Brian Zimmerman, Nichole E.

Brinkman\*, Anne Turner, Regan Murray, George Sorial and Jay Garland

\*Corresponding author phone: (513)569-7315; email: [brinkman.nichole@epa.gov](mailto:brinkman.nichole@epa.gov). Current address: 26 W. Martin Luther King Dr. MS 587 Cincinnati, Ohio 45268.

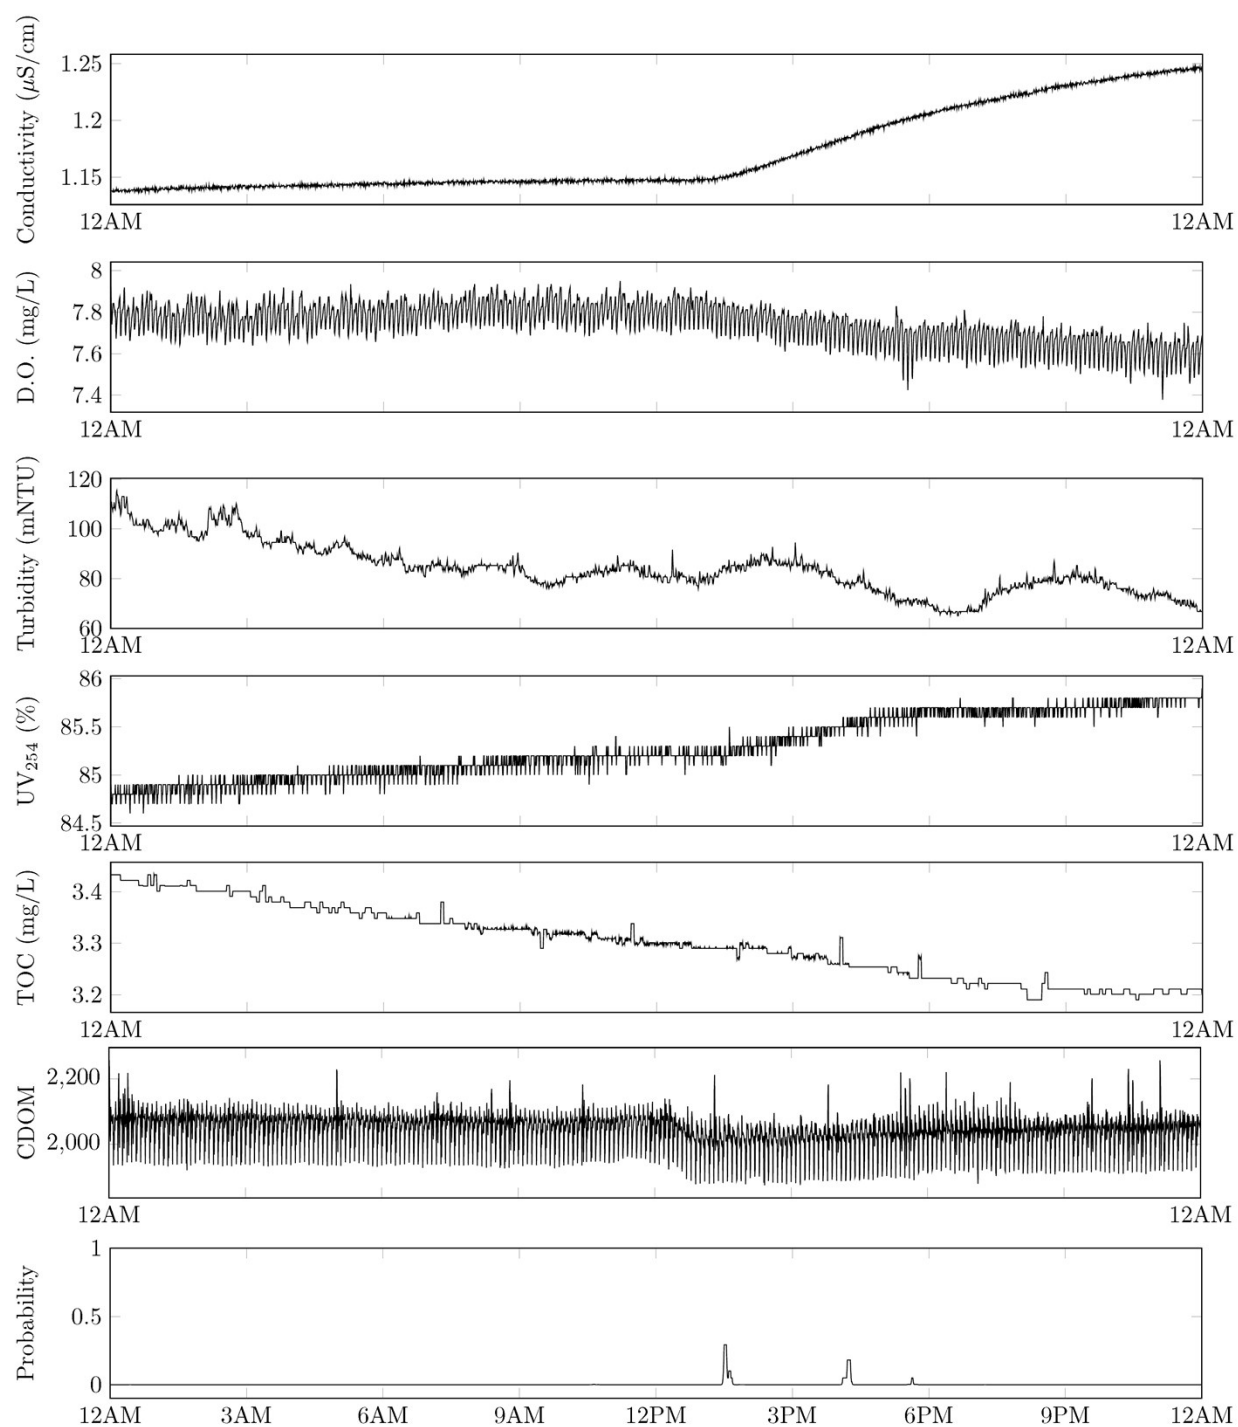

**Figure S1.** Sensor response and CANARY assessment during natural operating conditions without any alarms.

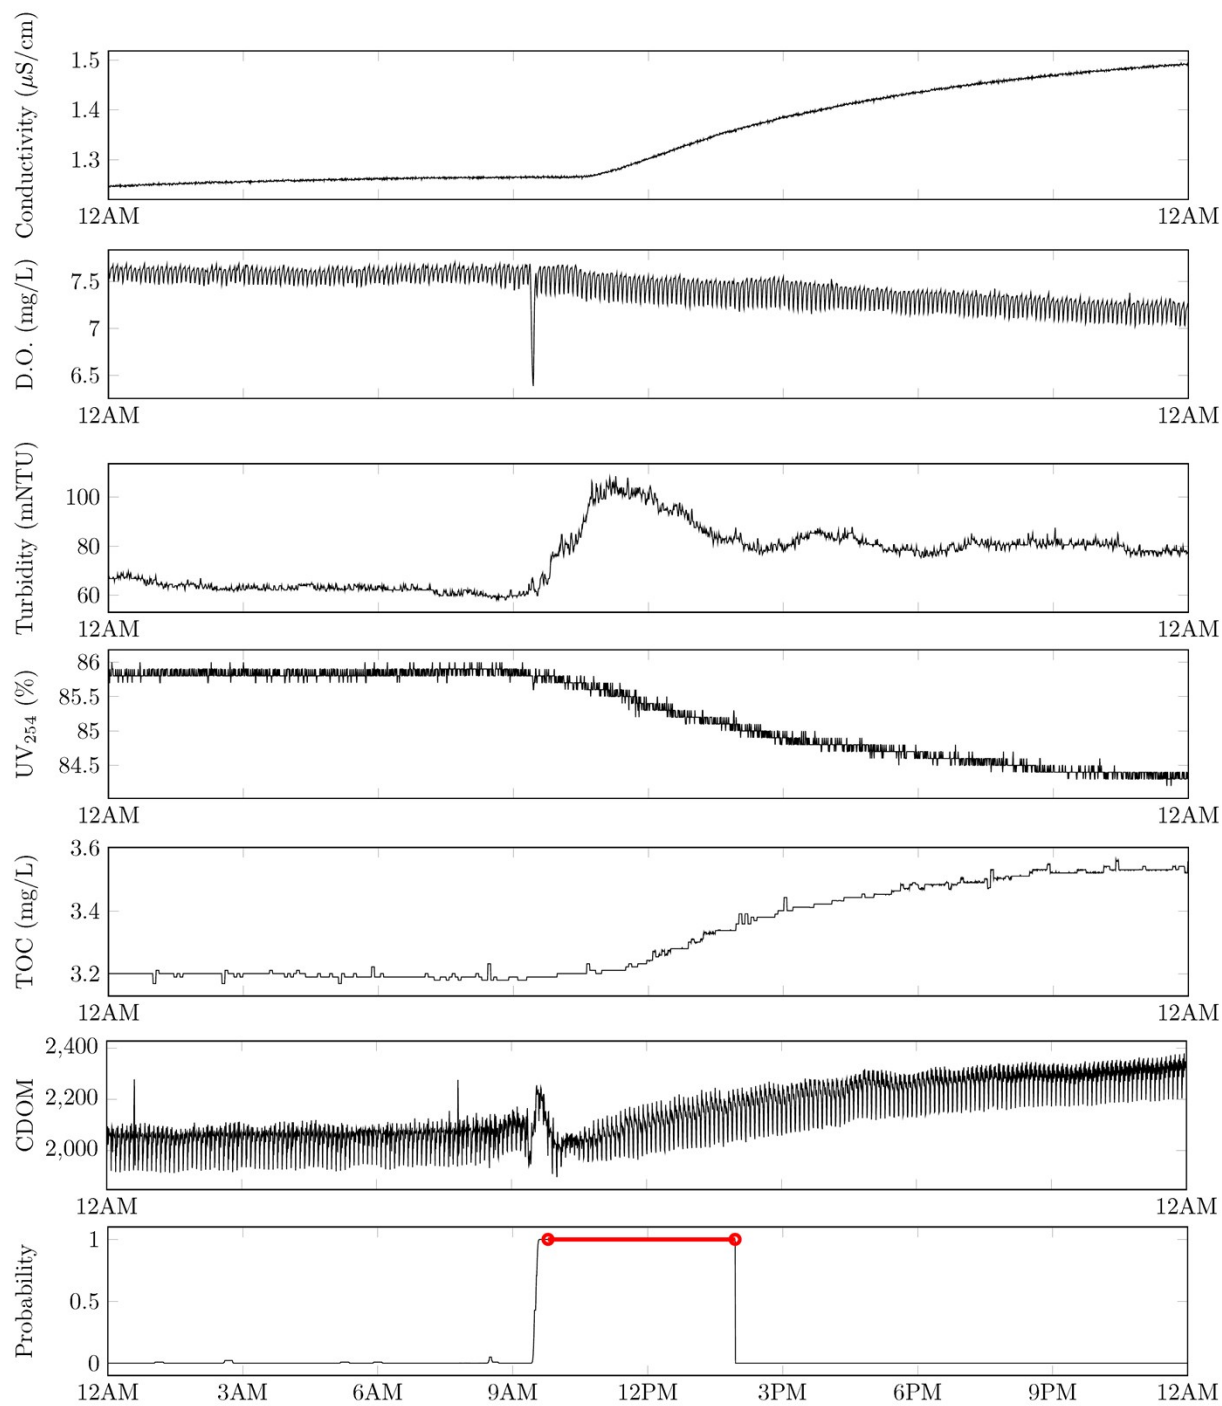

**Figure S2.** Sensor response and CANARY assessment during natural operating conditions with an alarm due to a feed composition change (30% increase in the influent COD).
